# Supplementary material for: MOF-derived 3D hierarchical nanoarrays consisting of NiCoZn-S nanosheets coupled with granular NiCo2S4nanowires for high-performance hybrid supercapacitors
Source: Royal Society of Chemistry journal article supplement (doi:10.1039/c9ta09692b), 2019-01-01
Supplement: c9ta09692b1.pdf [file c9ta09692b1.pdf]

**MOF-derived 3D hierarchical nanoarrays consisted of NiCoZn-S nanosheets  
coupled with granular NiCo<sub>2</sub>S<sub>4</sub> nanowires for high-performance hybrid  
supercapacitors**

Qingjun Yang, Yu Liu, Chengyu Deng, Ming Yan and Weidong Shi \*

Dr. Q Yang, Dr. M Yan, C Deng, Prof. Y Liu, Prof. W Shi

School of Chemistry and Chemical Engineering, Jiangsu University, Zhenjiang

212013, P.R. China.

E-mail: swd1978@ujs.edu.cn

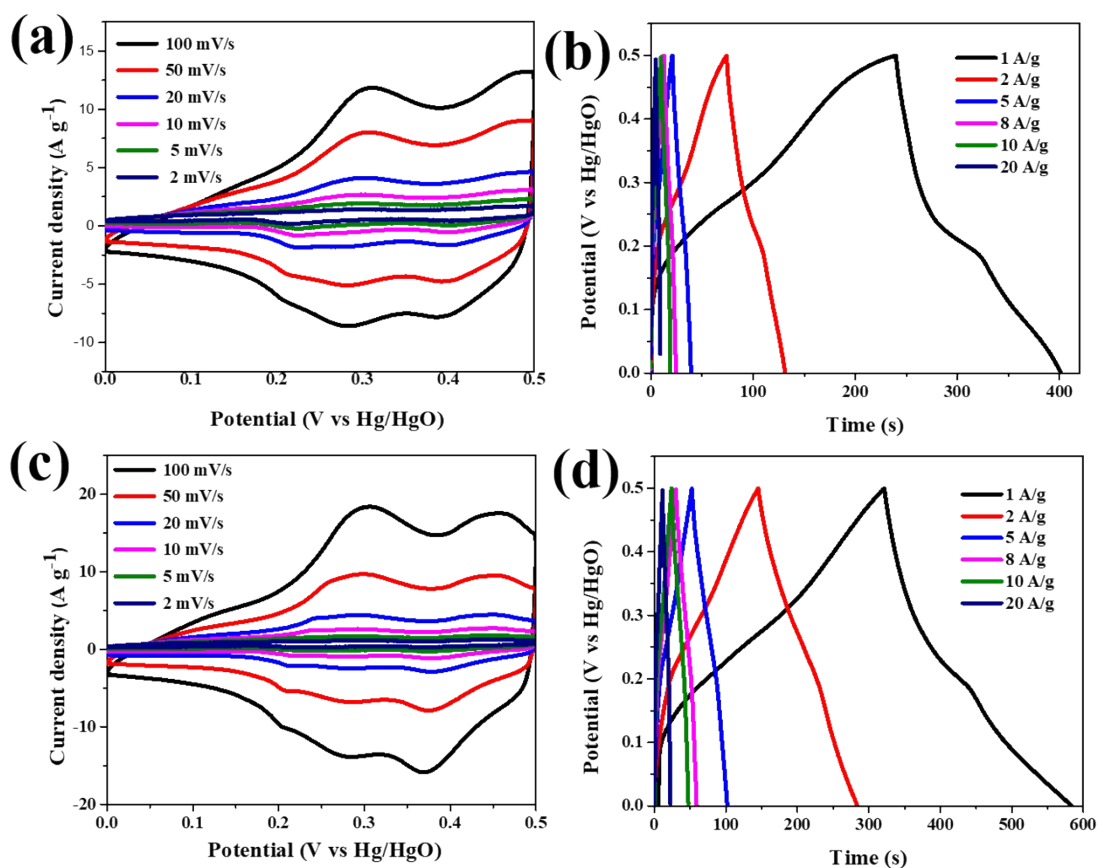

Figure S1. (a, b) The CV and GCD curves of the CF@NiCoZn-CH. (c, d) The CV and GCD curves of CF@NiCoZn-CH/NiCo-CH.

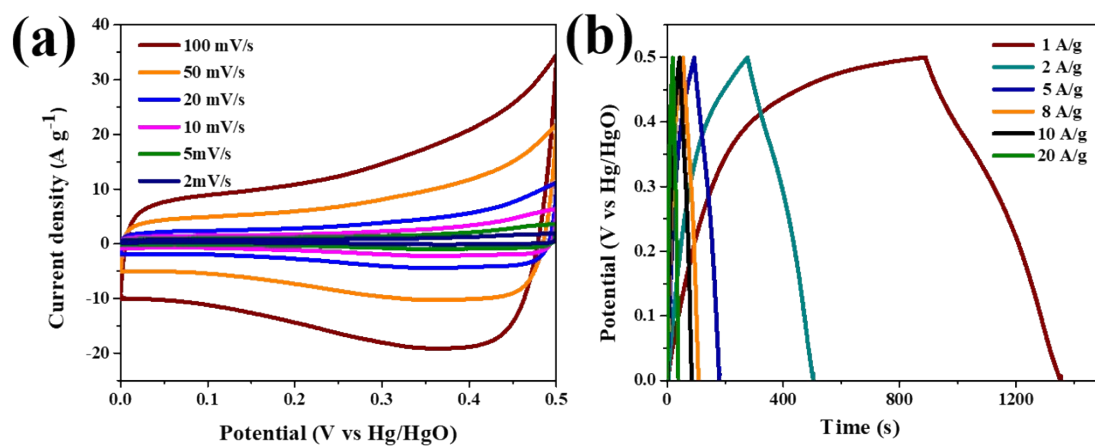

Figure S2. (a) The CV and (b) GCD curves of CF@NiCoZn-O/NiCo<sub>2</sub>O<sub>4</sub>.

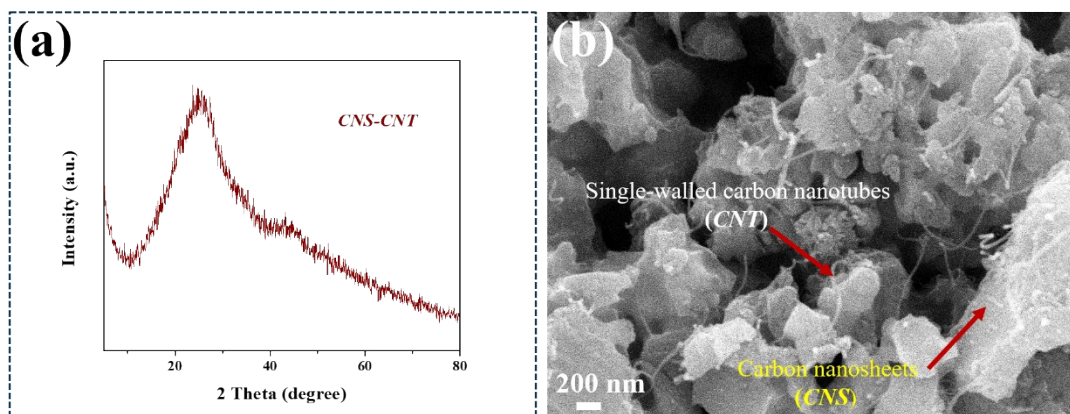

Figure S3. (a) The XRD pattern of CNS-CNT. (b) The SEM image of CNS-CNT.

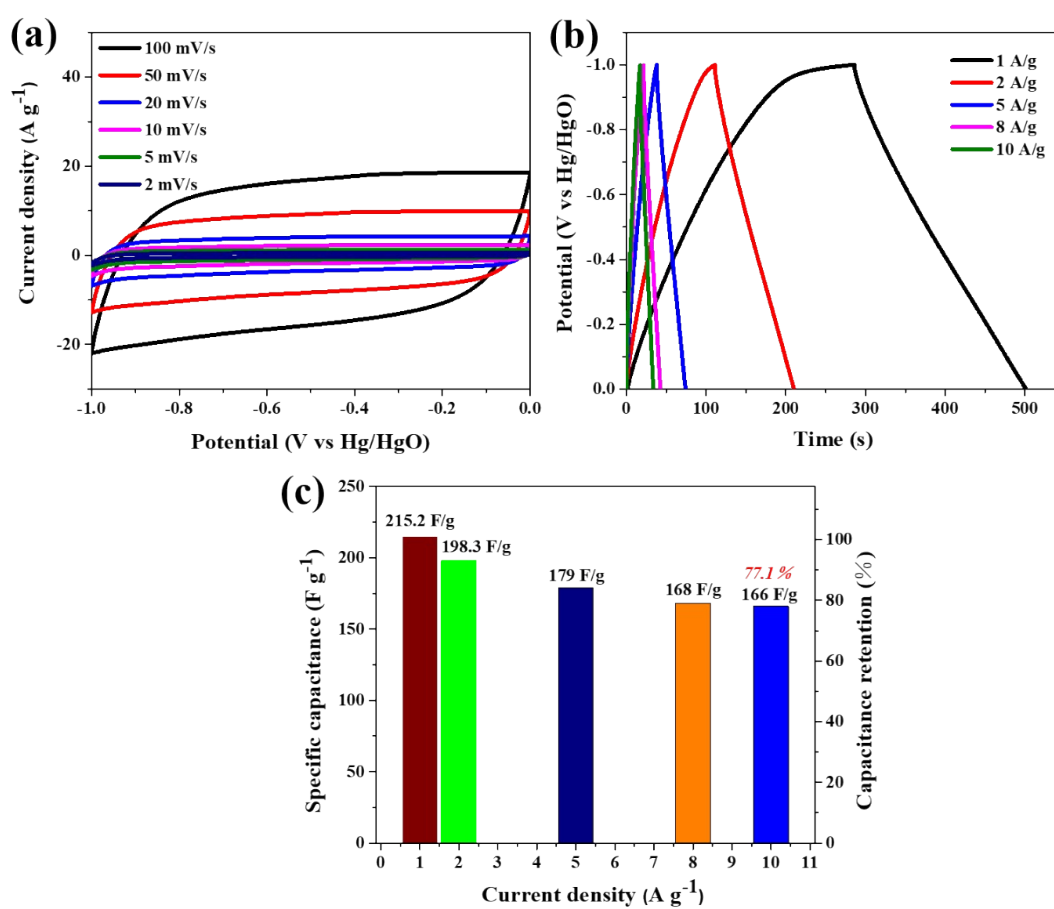

Figure S4. (a) The CV, (b) GCD and (c) capacitance retention rate curves of CNS-CNT.

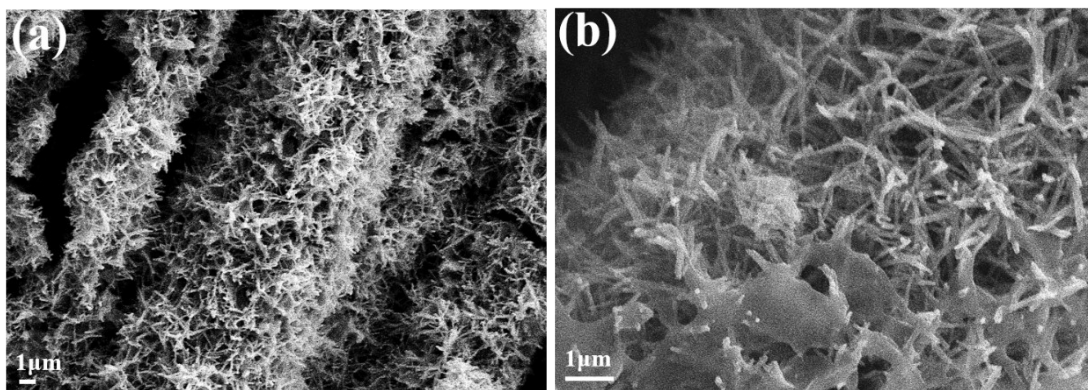

Figure S5. (a, b) The SEM images of CF@NiCoZn-S/NiCo<sub>2</sub>S<sub>4</sub> as cathode in the hybrid HSC after 10000 cycles.
